# Supplementary material
Source: Royal Society of Chemistry journal article supplement (doi:10.1039/d6an00496b)
Supplement: d6an00496b1.pdf [file d6an00496b1.pdf]

## Supporting Information

### **CoFe<sub>2</sub>O<sub>4</sub> nanozyme mediated chemiluminescence imaging-colorimetric dual-mode sensor for monitoring ascorbic acid**

Ye Zhang,<sup>a,1</sup> Maoying Peng,<sup>a,1</sup> Caiqiao Qin,<sup>a,1</sup> Yuchen Du,<sup>a</sup> Feng Shi,<sup>a</sup> Juan Li,<sup>a,\*</sup>  
Zhanjun Yang,<sup>a,\*</sup> Wei Ma<sup>b,c,\*</sup>

<sup>a</sup>*School of Chemistry and Chemical Engineering, Yangzhou University, Yangzhou 225002, P.R. China*

<sup>b</sup>*Department of Otolaryngology, Head and Neck Surgery, Northern Jiangsu People's Hospital, Yangzhou, Jiangsu, China*

<sup>c</sup>*The Yangzhou Clinical Medical College of Xuzhou Medical University, Yangzhou, Jiangsu, China*

<sup>1</sup>These authors contributed equally to this work.

*\*Corresponding Author*

*Email: ybdd1980@163.com; zjyang@yzu.edu.cn; lijuan@yzu.edu.cn*

#### **Table of Contents**

|                                                                                   |     |
|-----------------------------------------------------------------------------------|-----|
| Materials and reagents.....                                                       | S-2 |
| Apparatus.....                                                                    | S-2 |
| Steady-state kinetics analysis of CoFe <sub>2</sub> O <sub>4</sub> nanozyme ..... | S-2 |
| Methylene blue degradation .....                                                  | S-3 |
| Preparation of CL imaging sensor arrays.....                                      | S-3 |
| Fig. S1 .....                                                                     | S-4 |
| Fig. S2 .....                                                                     | S-5 |
| Table S1.....                                                                     | S-6 |
| Table S2.....                                                                     | S-7 |
| Reference.....                                                                    | S-8 |

## MATERIALS AND APPARATUS

**Materials and reagents.** Chitosan (CS) was purchased from Sigma-Aldrich Chemical Co. (St. Louis, MO). Luminol and p-iodophenol (PIP) were purchased from Acros (Belgium) and Alfa Aesar Ltd. (China), respectively. Trisodium citrate, cobalt nitrate hexahydrate, 2-methylimidazole, ethanol, hexadecyl trimethyl ammonium bromide (CTAB), hydrogen peroxide ( $H_2O_2$ ), methylene blue, potassium chloride, sodium chloride, cobalt chloride, ferrous chloride, potassium ferricyanide, and dimethyl sulfoxide were purchased from Sinopharm Chemical Reagent Co., Ltd. (China). 3,3',5,5'-tetramethylbenzidine (TMB) was purchased from Aladdin Reagent (Shanghai) Co., Ltd.

**Apparatus.** Chemiluminescence (CL) imaging signals were recorded by FluorChemE imaging system (Protein Simple Co., America). Ultraviolet-visible (UV-vis) experiments were carried out on UV-2550 Spectrophotometer (Shimadzu Co., Japan). Scanning electron micrographs (SEM) were obtained with a Hitachi S-4800 scanning electron microscope (Japan) at an acceleration voltage of 12 kV. Transmission electron microscope images were measured on a Tecnai 12 transmission electron microscope (TEM, Philips, the Netherlands), and the operating voltage was 120 kV. X-ray diffraction (XRD) patterns were measured on a D8 Advance polycrystalline X-ray diffractometer (Bruker AXS, Germany).

## EXPERIMENTAL SECTION

**Steady-state kinetics analysis of  $CoFe_2O_4$  nanozyme.** Other conditions were consistent, and the steady-state kinetics of  $CoFe_2O_4$  nanozyme were detected by

adjusting TMB concentrations or  $\text{H}_2\text{O}_2$  concentrations in the reaction system. According to the Michaelis-Menten equation, the dynamical parameters are calculated separately.

**Methylene blue degradation.** 20  $\mu\text{L}$  of methylene blue (2 mg/mL) was dispersed in 1.76 mL of phosphate buffer solution (0.1 M, pH=7.4). Then 200  $\mu\text{L}$  of  $\text{CoFe}_2\text{O}_4$  (1 mg/mL) and 20  $\mu\text{L}$  of  $\text{H}_2\text{O}_2$  (10 M) were added to the solution. Avoid light for 6 h to reduce the interference of photodegradation of methylene blue. Finally, the absorbance of the solution at 800 nm to 500 nm was detected by UV spectrophotometer.

**Preparation of CL imaging sensor arrays.** The slides were soaked in a solution of sulfuric acid and hydrogen peroxide in a volume ratio of 7:3, allowed for 8 to 12 h, rinsed with water, and left to dry. Then, the slides were immersed in a 1% GPTMS/toluene solution overnight, rinsed with toluene and ethanol in turn, and dried to make epoxy-silanized slides. 48 microwells in 4\*12 format were printed on glass slides by using screen printing technology and stencils. 1 mg of  $\text{CoFe}_2\text{O}_4$  was dissolved in 1 mL of deionized water, mixed with an equal volume of 1.0 wt% chitosan solution, and shaken well. 5  $\mu\text{L}$  of the well-mixed solution was dropped into the CL micropores and dried naturally.

Peroxidase-like activity of  $\text{CoFe}_2\text{O}_4$  in the presence of different concentrations of

AA.

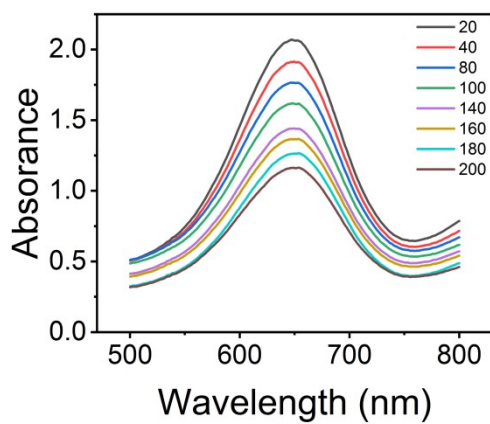

**Fig. S1** UV-vis spectra of TMB+ $\text{CoFe}_2\text{O}_4$ + $\text{H}_2\text{O}_2$ +AA (20-200  $\mu\text{L}$ , 2 mM)

**Stability of the sensor based on CoFe<sub>2</sub>O<sub>4</sub> nanozyme.**

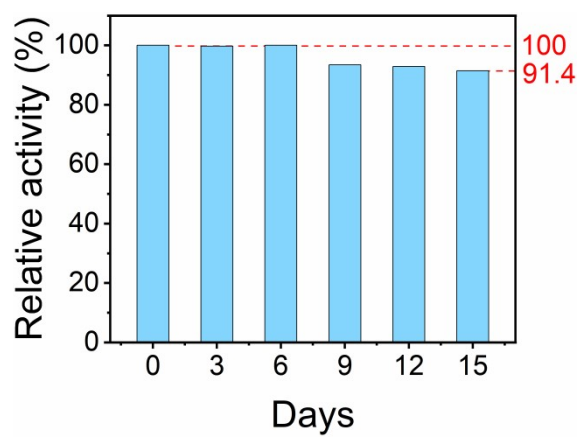

**Fig. S2** Stability of the sensor based on CoFe<sub>2</sub>O<sub>4</sub> nanozyme for 15 days of storage.

**Table S1. Comparison of kinetic parameters of various nanozymes.**

| Sample                                | Substrate                     | $K_m$<br>(mM) | $V_m$<br>( $\times 10^{-8}$ M/s) | Ref.         |
|---------------------------------------|-------------------------------|---------------|----------------------------------|--------------|
| HRP                                   | TMB                           | 0.434         | 10                               | S1           |
|                                       | H <sub>2</sub> O <sub>2</sub> | 3.7           | 8.71                             |              |
| Fe <sub>3</sub> O <sub>4</sub> /GONRs | TMB                           | 5.68          | 3.71                             | S2           |
|                                       | H <sub>2</sub> O <sub>2</sub> | 0.15          | 5.56                             |              |
| PtFe@Fe <sub>3</sub> O <sub>4</sub>   | TMB                           | 0.213         | 5.447                            | S3           |
|                                       | H <sub>2</sub> O <sub>2</sub> | 53.55         | 1.078                            |              |
| MA-Hem/Au-Ag                          | TMB                           | 2.39          | 1.42                             | S4           |
|                                       | H <sub>2</sub> O <sub>2</sub> | 2.71          | 11.4                             |              |
| Fe-PCN-222                            | TMB                           | 0.78          | 30.6                             | S5           |
|                                       | H <sub>2</sub> O <sub>2</sub> | 1.49          | 4.50                             |              |
| CoFe <sub>2</sub> O <sub>4</sub>      | TMB                           | 0.28          | 64.98                            | This<br>work |
|                                       | H <sub>2</sub> O <sub>2</sub> | 0.31          | 2.31                             |              |

**Table S2. Various sensing strategies for detecting AA.**

| Methods         | Detection range<br>( $\mu\text{M}$ ) | Detection limit<br>( $\mu\text{M}$ ) | Ref.      |
|-----------------|--------------------------------------|--------------------------------------|-----------|
| Electrochemical | 220-211                              | 28                                   | S6        |
| Fluorescence    | 350-70                               | 200                                  | S7        |
| LSPR            | 10-200                               | 25.78                                | S8        |
| Fluorescence    | 50-1000                              | 41.94                                | S9        |
| CL imaging      | 40-160                               | 25                                   | This work |
| Colorimetric    | 20-200                               | 18                                   | This work |

## Reference

- [S1] L. Z. Gao, J. Zhuang, L. Nie, J. B. Zhang, Y. Zhang, N. Gu, T. H. Wang, J. Feng, D. L. Yang, S. Perrett, X. Y. Yan, *Nat. Nanotechnol.*, 2007, **2**, 577-583.
- [S2] S. M. Tai, H. Cao, Y. K. Cui, C. F. Peng, J. G. Xu, Z. P. Wang, *Food Chem.*, 2024, **450**, 139258.
- [S3] S. S. Li, L. Shang, B. L. Xu, S. H. Wang, K. Gu, Q. Y. Wu, Y. Sun, Q. H. Zhang, H. L. Yang, F. R. Zhang, L. Gu, T. R. Zhang, H. Y. Liu, *Angew. Chem. Int. Edit.*, 2019, **58**, 12624-12631.
- [S4] H. Liu, Y. Hua, Y. Cai, L. Feng, H. Wang, *Anal. Chim. Acta*, 2019, **1092**, 57-65.
- [S5] Y. Shu, Q. Ye, J. Tan, H. Lv, Z. Liu, Q. Mo, *ACS Appl. Nano Mater.*, 2022, **5**, 17909-17918.
- [S6] Z. H. Fan, B. Zhao, S. N. Wu, H. R. Wang, T. T. Cao, T. Zhu, X. B. Zhang, L. Liu, Z. W. Tong, *J. Mater. Res.*, 2021, **36**, 916-924.
- [S7] X. Yan, L. He, C. Zhou, Z. J. Qian, P. Hong, S. Sun, C. Li, *Chem Physics*, 2019, **522**, 211-213.
- [S8] G. Zhu, L. Singh, Y. Wang, R. Singh, B. Y. Zhang, F. Z. Liu, B. K. Kaushik, S. Kumar, *Photonic Sens.*, 2021, **11**, 418-434.
- [S9] X. Wang, C. C. Long, Z. X. Jiang, T.P. Qing, K. W. Zhang, P. Zhang, B. Feng, *Anal. Methods*, 2019, **11**, 4580.
